# Supplementary material for: Analysis across Taiwan Biobank, Biobank Japan, and UK Biobank identifies hundreds of novel loci for 36 quantitative traits
Source: PubMed Central journal article supplement — Cell Genom. 2023 Nov 16;3(12):100436. doi: 10.1016/j.xgen.2023.100436 (PMC10726425; doi:10.1016/j.xgen.2023.100436), 2023-11-16
Supplement: mmc1.pdf [file mmc1.pdf]

**Cell Genomics, Volume 3**

**Supplemental information**

**Analysis across Taiwan Biobank, Biobank Japan,  
and UK Biobank identifies hundreds  
of novel loci for 36 quantitative traits**

**Chia-Yen Chen, Tzu-Ting Chen, Yen-Chen Anne Feng, Mingrui Yu, Shu-Chin Lin, Ryan J. Longchamps, Shi-Heng Wang, Yi-Hsiang Hsu, Hwai-I. Yang, Po-Hsiu Kuo, Mark J. Daly, Wei J. Chen, Hailiang Huang, Tian Ge, and Yen-Feng Lin**

## **Supplementary Information**

### **Analysis across Taiwan Biobank, Biobank Japan and UK Biobank identifies hundreds of novel loci for 36 quantitative traits**

Chia-Yen Chen, Tzu-Ting Chen, Yen-Chen Anne Feng, Mingrui Yu, Shu-Chin Lin, Ryan J. Longchamps, Shi-Heng Wang, Yi-Hsiang Hsu, Hwai-I Yang, Po-Hsiu Kuo, Mark J. Daly, Wei J. Chen, Hailiang Huang, Tian Ge, Yen-Feng Lin

**Figure S1-S68**

**Figure S1. Manhattan plot and Q-Q plot for association tests in TWB (batch 1 and batch 2 meta-analysis) for height (HT), related to Figure 2A**

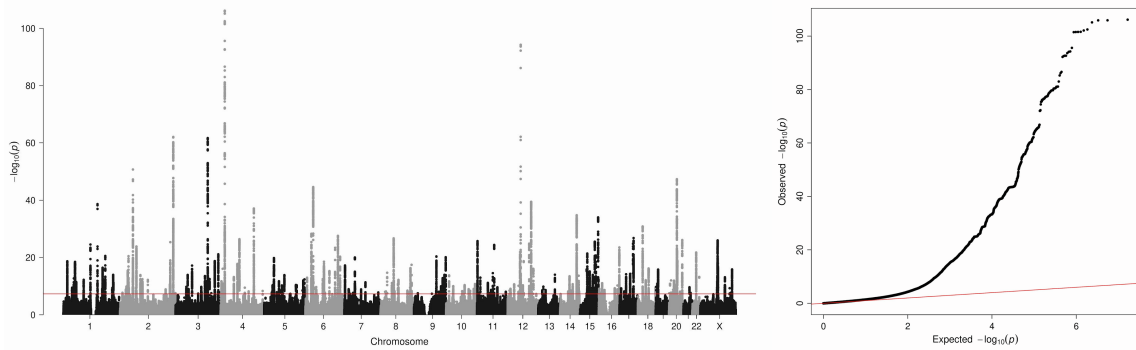

**Figure S2. Manhattan plot and Q-Q plot for association tests in TWB (batch 1 and batch 2 meta-analysis) for weight (WT), related to Figure 2A**

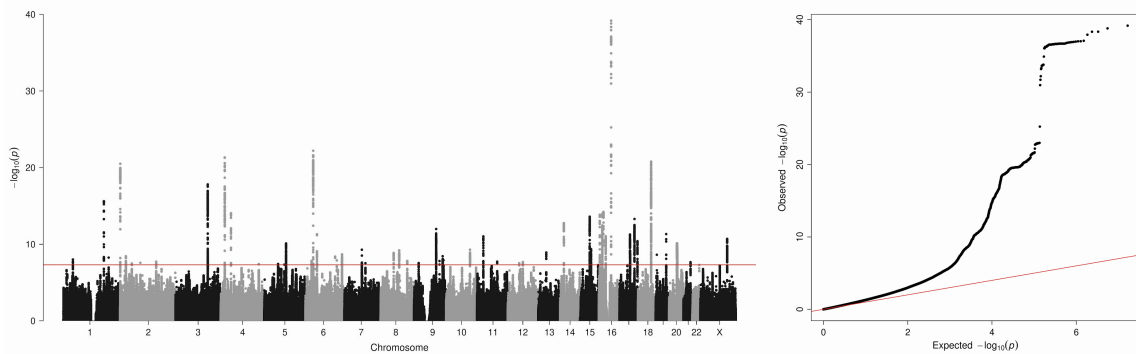

**Figure S3. Manhattan plot and Q-Q plot for association tests in TWB (batch 1 and batch 2 meta-analysis) for body mass index (BMI), related to Figure 2A**

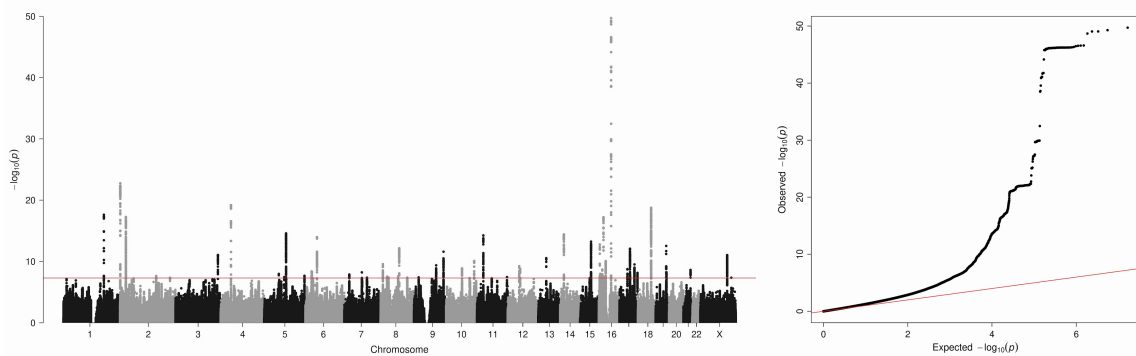

**Figure S4. Manhattan plot and Q-Q plot for association tests in TWB (batch 1 and batch 2 meta-analysis) for body fat rate (BFR), related to Figure 2A**

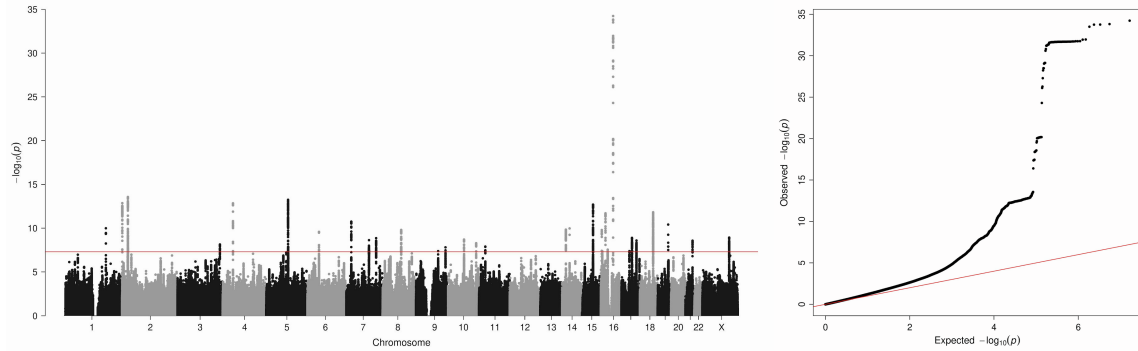

**Figure S5. Manhattan plot and Q-Q plot for association tests in TWB (batch 1 and batch 2 meta-analysis) for waist circumference (WC), related to Figure 2A**

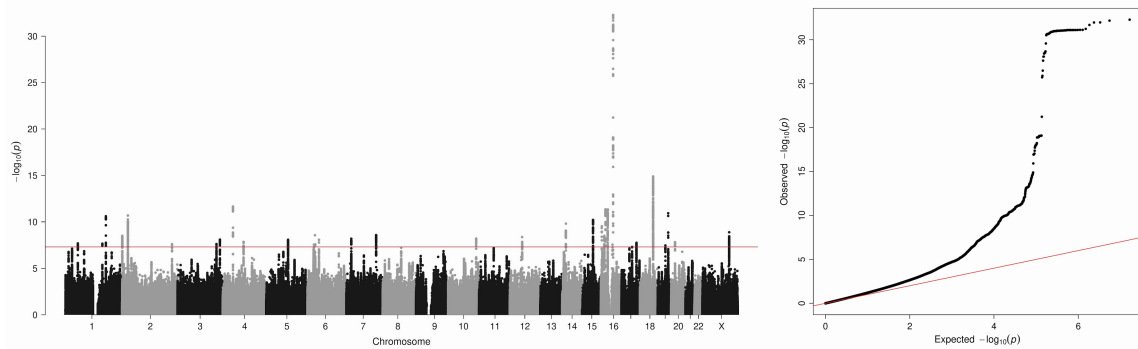

**Figure S6. Manhattan plot and Q-Q plot for association tests in TWB (batch 1 and batch 2 meta-analysis) for hip circumference (HC), related to Figure 2A**

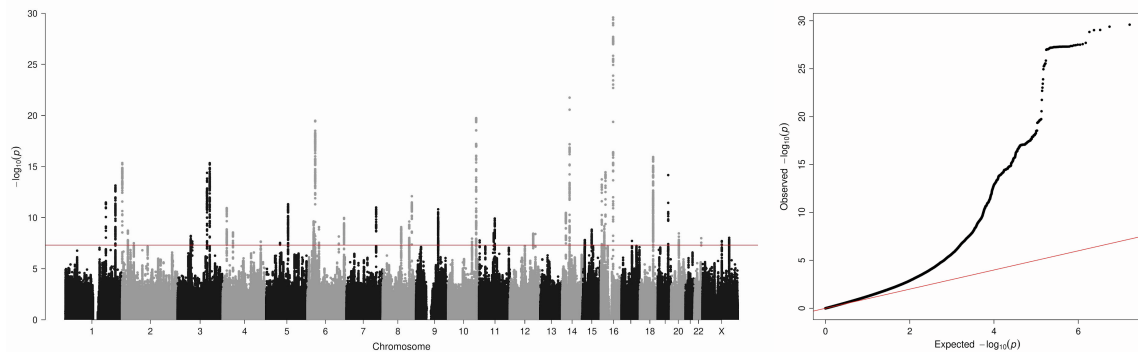



**Figure S7. Manhattan plot and Q-Q plot for association tests in TWB (batch 1 and batch 2 meta-analysis) for waist-to-Hip ratio (WHR), related to Figure 2A**

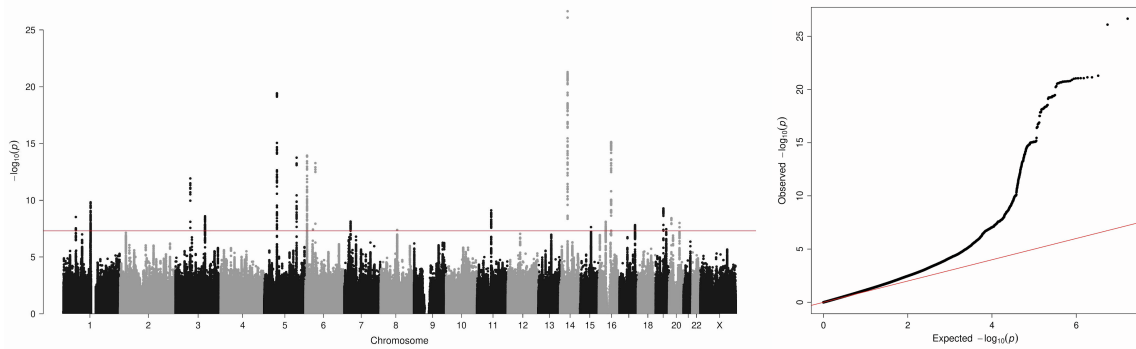

**Figure S8. Manhattan plot and Q-Q plot for association tests in TWB (batch 1 and batch 2 meta-analysis) for bone mineral density T-score (BMD-T), related to Figure 2A**

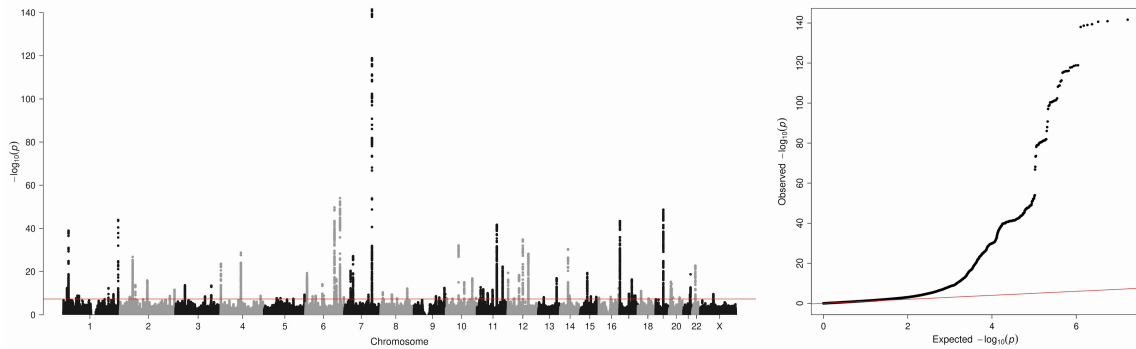

**Figure S9. Manhattan plot and Q-Q plot for association tests in TWB (batch 1 and batch 2 meta-analysis) for bone density Z-score (BMD-Z), related to Figure 2A**

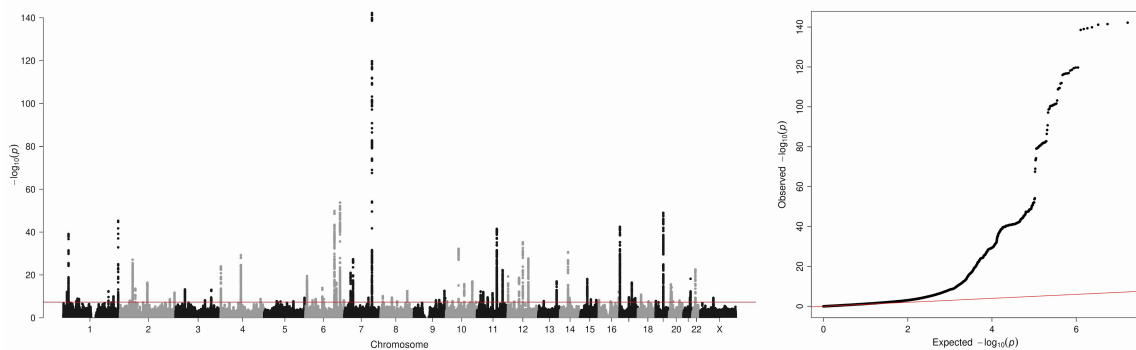

**Figure S10. Manhattan plot and Q-Q plot for association tests in TWB (batch 1 and batch 2 meta-analysis) for diastolic blood pressure (DBP), related to Figure 2A**

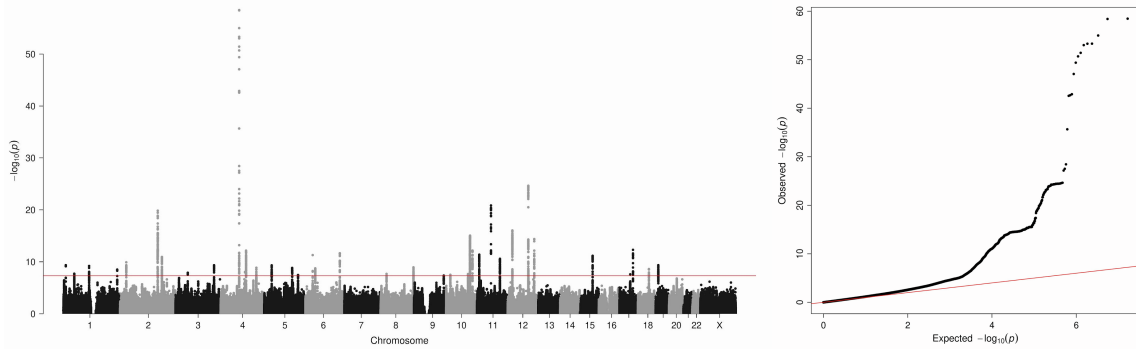

**Figure S11. Manhattan plot and Q-Q plot for association tests in TWB (batch 1 and batch 2 meta-analysis) for systolic blood pressure (SBP), related to Figure 2A**

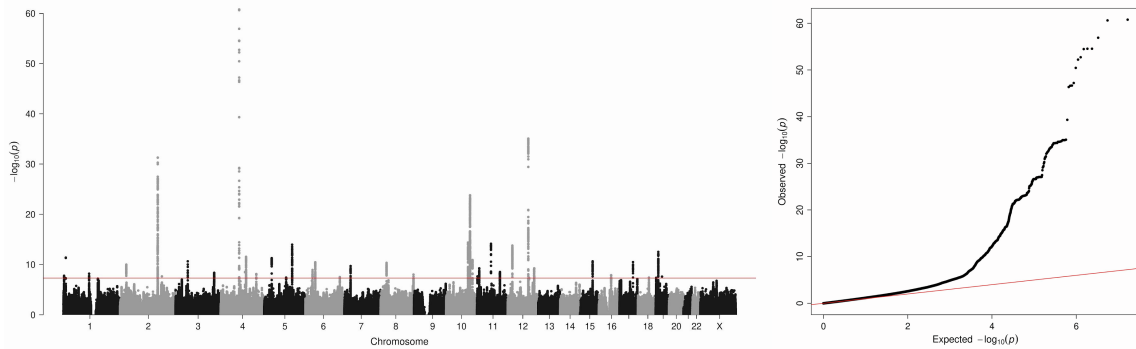

**Figure S12. Manhattan plot and Q-Q plot for association tests in TWB (batch 1 and batch 2 meta-analysis) for resting heart rate (HR), related to Figure 2A**

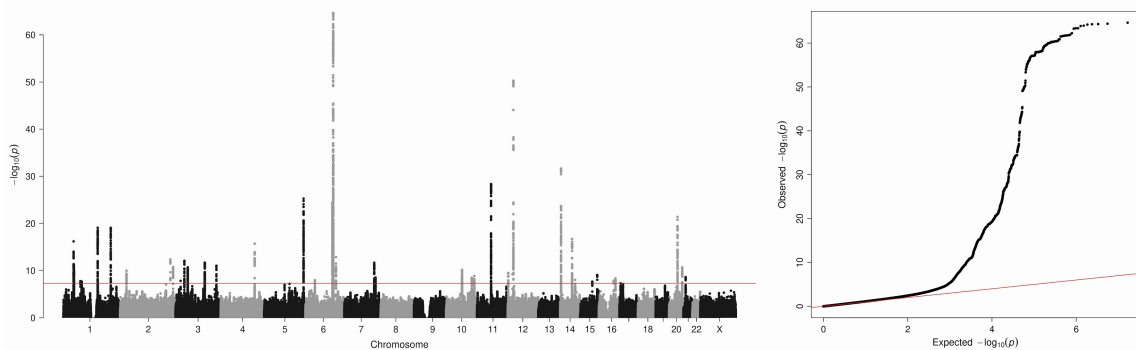

**Figure S13. Manhattan plot and Q-Q plot for association tests in TWB (batch 1 and batch 2 meta-analysis) for white blood cell (WBC), related to Figure 2A**

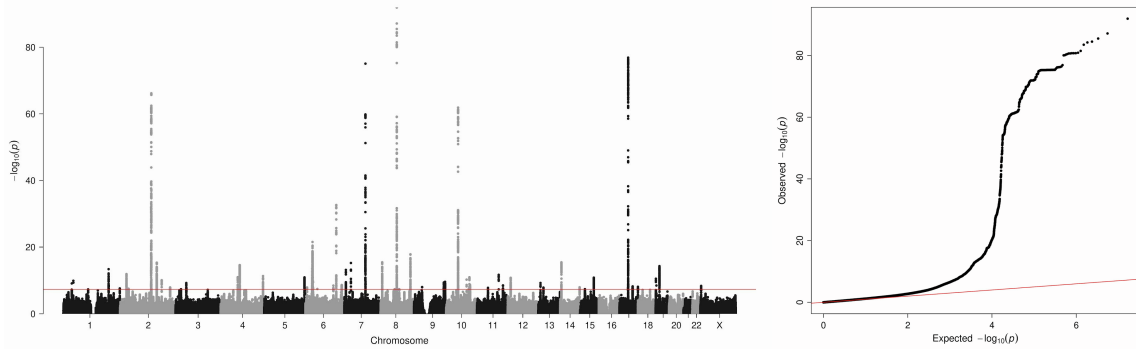

**Figure S14. Manhattan plot and Q-Q plot for association tests in TWB (batch 1 and batch 2 meta-analysis) for red blood cell (RBC), related to Figure 2A**

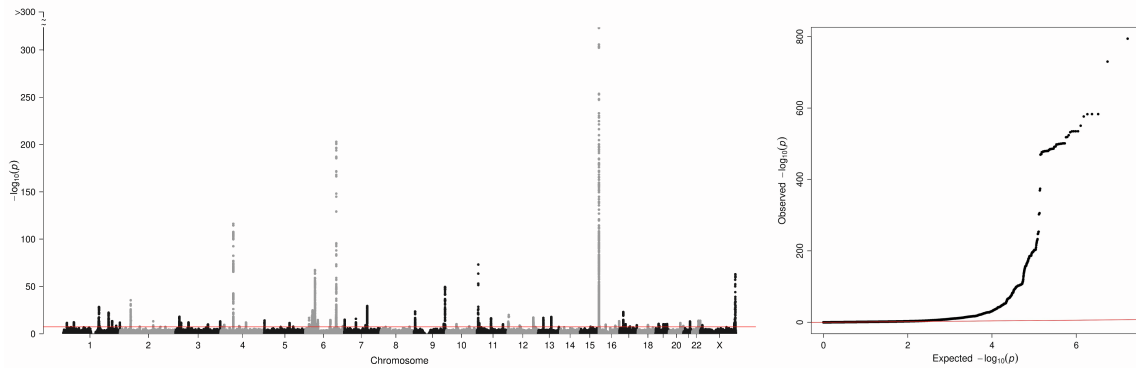

**Figure S15. Manhattan plot and Q-Q plot for association tests in TWB (batch 1 and batch 2 meta-analysis) for hemoglobin (HB), related to Figure 2A**

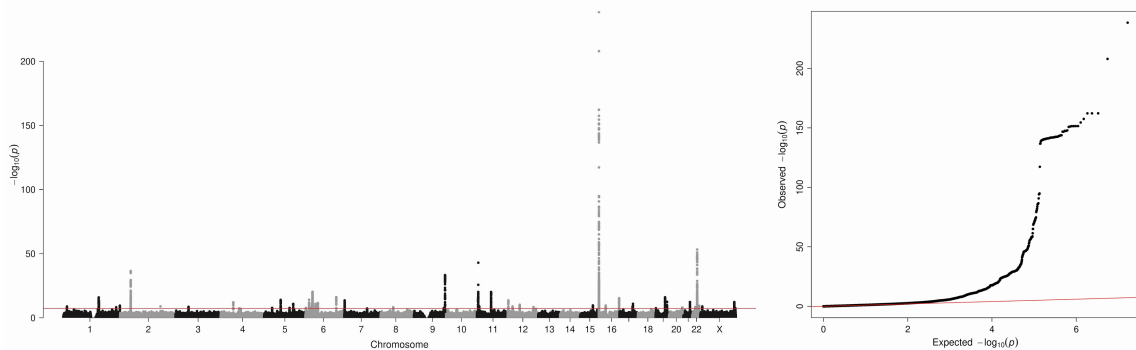

**Figure S16. Manhattan plot and Q-Q plot for association tests in TWB (batch 1 and batch 2 meta-analysis) for hematocrit (HCT), related to Figure 2A**

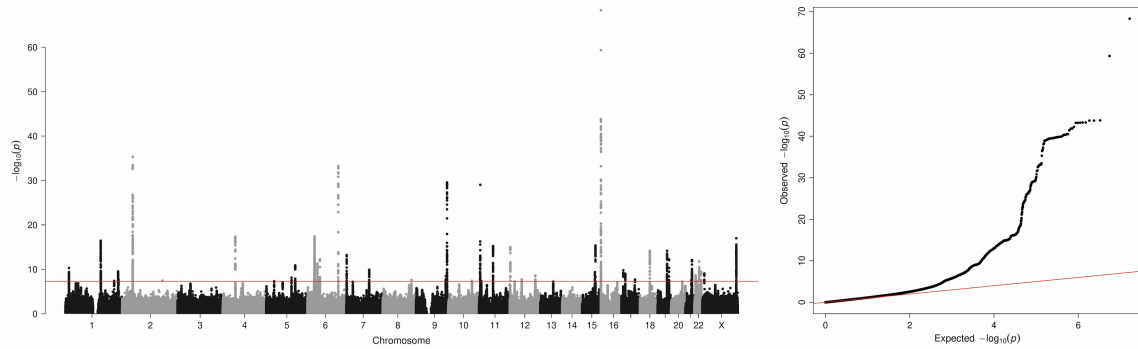

**Figure S17. Manhattan plot and Q-Q plot for association tests in TWB (batch 1 and batch 2 meta-analysis) for platelet (PLT), related to Figure 2A**

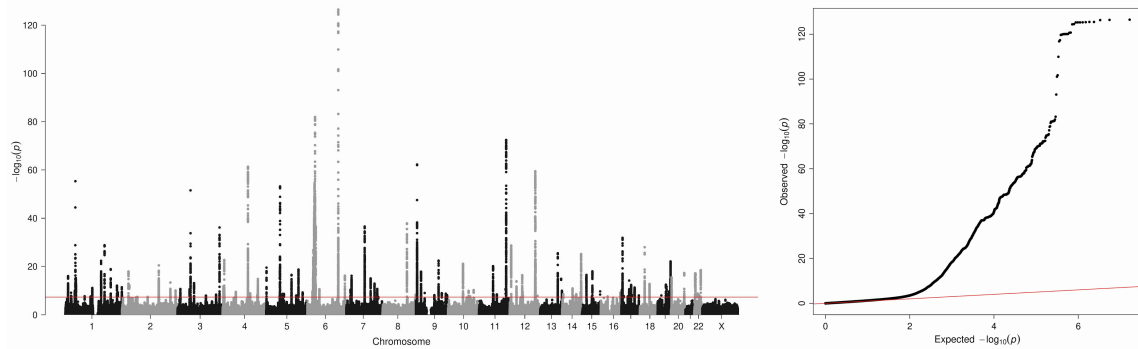

**Figure S18. Manhattan plot and Q-Q plot for association tests in TWB (batch 1 and batch 2 meta-analysis) for blood urea nitrogen (BUN), related to Figure 2A**

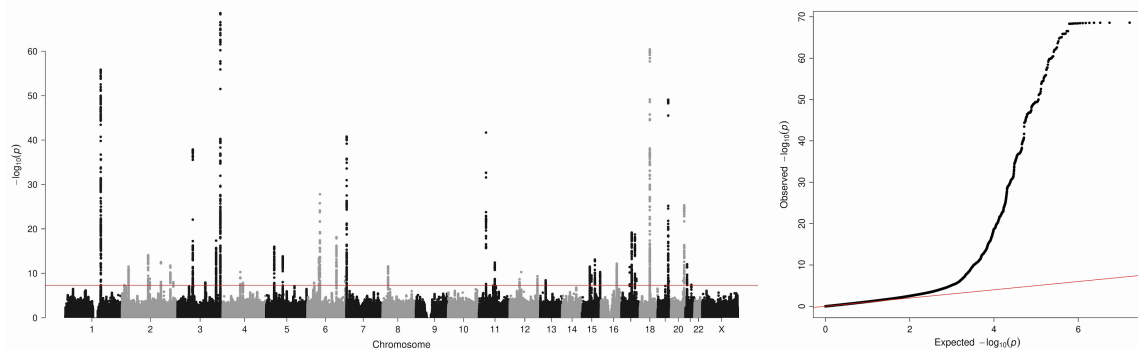

**Figure S19. Manhattan plot and Q-Q plot for association tests in TWB (batch 1 and batch 2 meta-analysis) for creatinine (CR), related to Figure 2A**

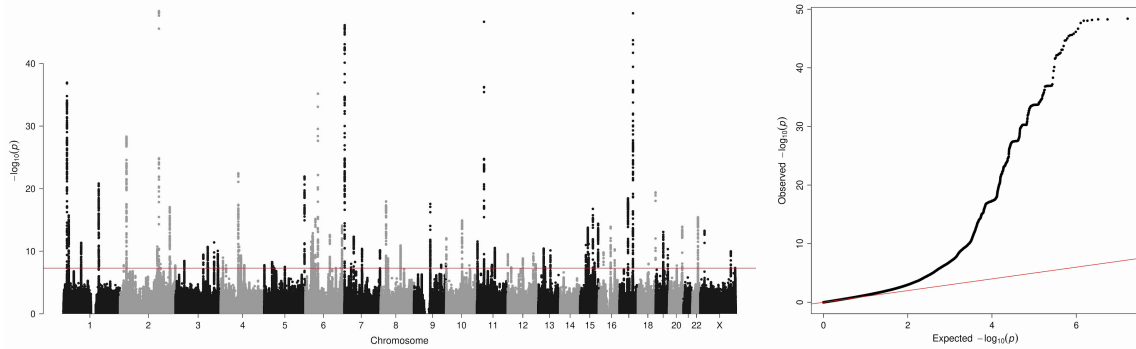

**Figure S20. Manhattan plot and Q-Q plot for association tests in TWB (batch 1 and batch 2 meta-analysis) for microalbumin urine (mALB), related to Figure 2A**

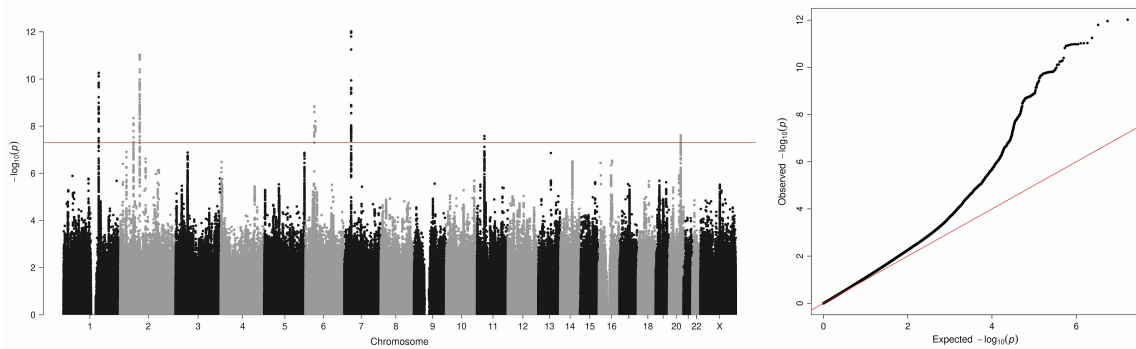

**Figure S21. Manhattan plot and Q-Q plot for association tests in TWB (batch 1 and batch 2 meta-analysis) for uric acid (UA), related to Figure 2A**

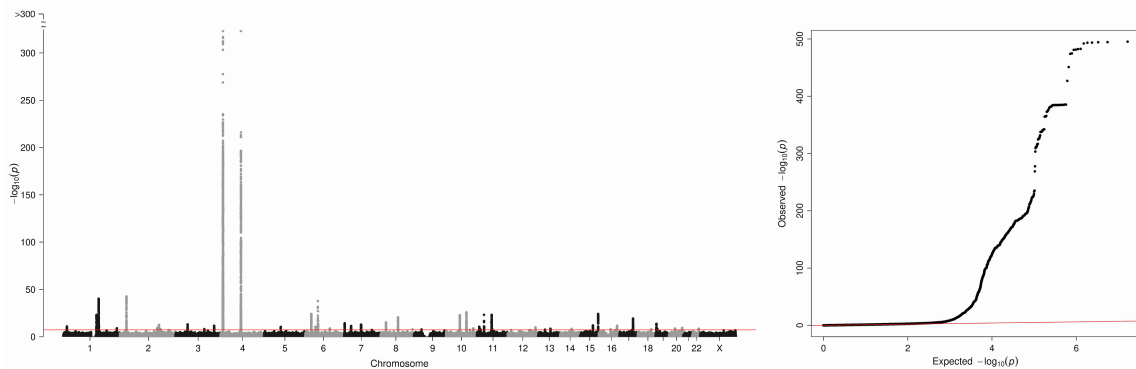

**Figure S22. Manhattan plot and Q-Q plot for association tests in TWB (batch 1 and batch 2 meta-analysis) for total bilirubin (T-BIL), related to Figure 2A**

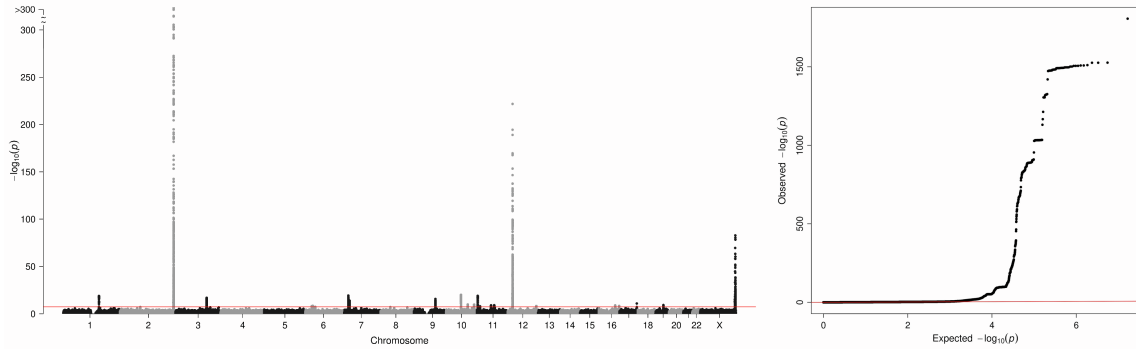

**Figure S23. Manhattan plot and Q-Q plot for association tests in TWB (batch 1 and batch 2 meta-analysis) for alanine aminotransferase (ALT), related to Figure 2A**

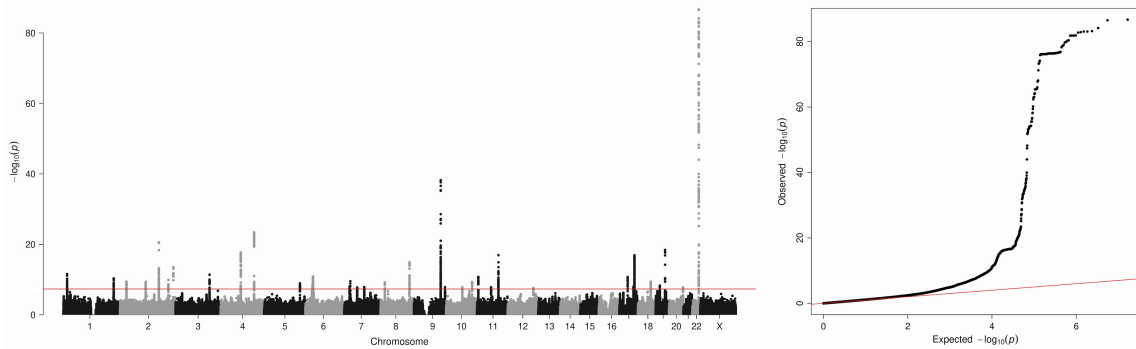

**Figure S24. Manhattan plot and Q-Q plot for association tests in TWB (batch 1 and batch 2 meta-analysis) for aspartate aminotransferase (AST), related to Figure 2A**

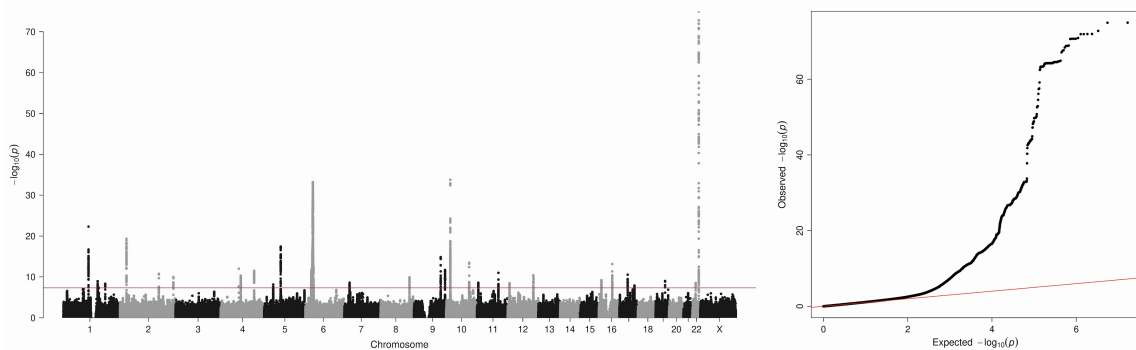

**Figure S25. Manhattan plot and Q-Q plot for association tests in TWB (batch 1 and batch 2 meta-analysis) for gamma-glutamyltransferase (GGT), related to Figure 2A**

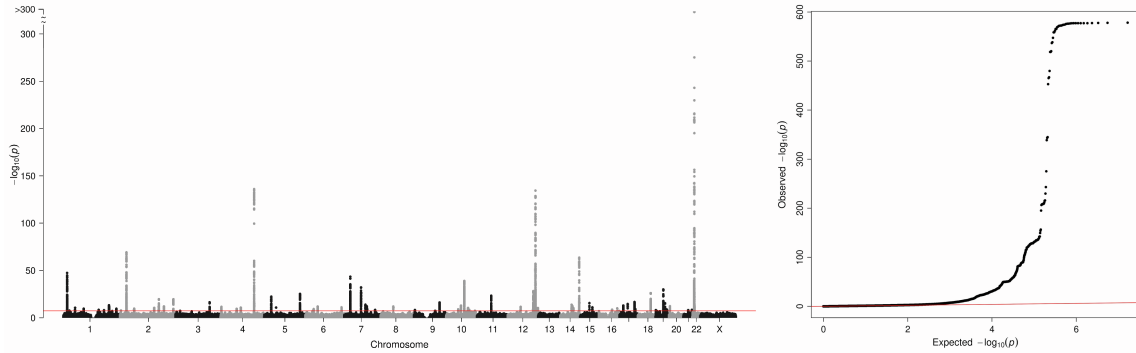

**Figure S26. Manhattan plot and Q-Q plot for association tests in TWB (batch 1 and batch 2 meta-analysis) for alpha-fetoprotein (AFP), related to Figure 2A**

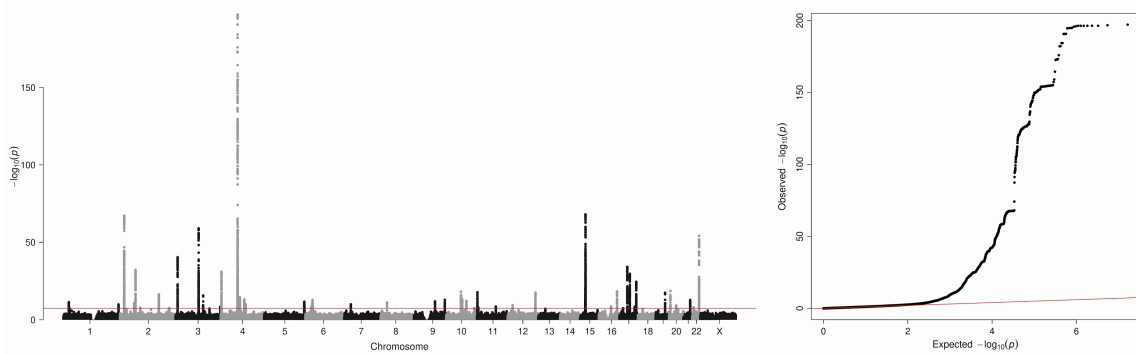

**Figure S27. Manhattan plot and Q-Q plot for association tests in TWB (batch 1 and batch 2 meta-analysis) for albumin (ALB), related to Figure 2A**

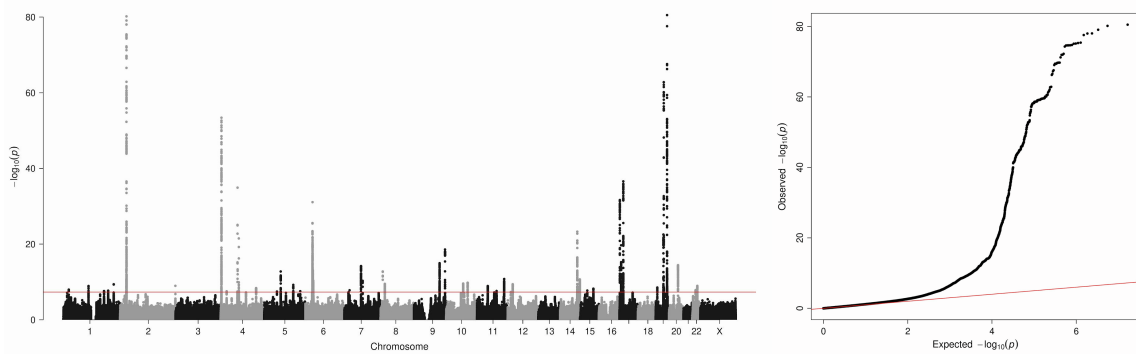

**Figure S28. Manhattan plot and Q-Q plot for association tests in TWB (batch 1 and batch 2 meta-analysis) for forced expiratory flow (FEV1), related to Figure 2A**

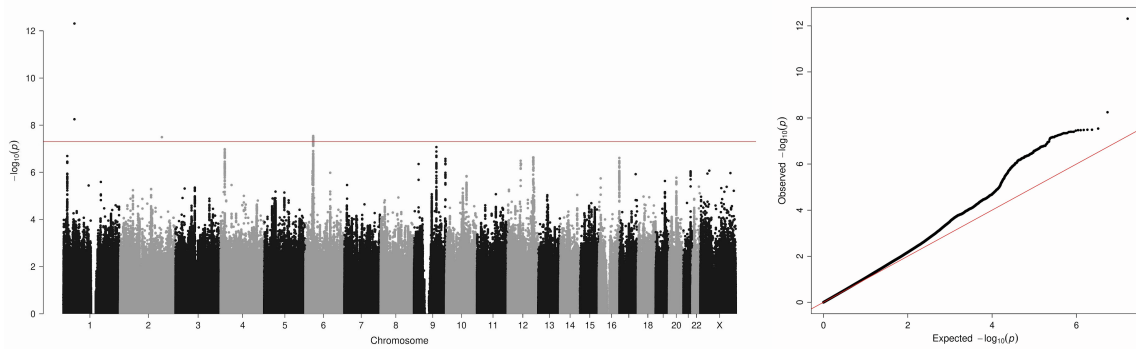

**Figure S29. Manhattan plot and Q-Q plot for association tests in TWB (batch 1 and batch 2 meta-analysis) for forced vital capacity (FVC), related to Figure 2A**

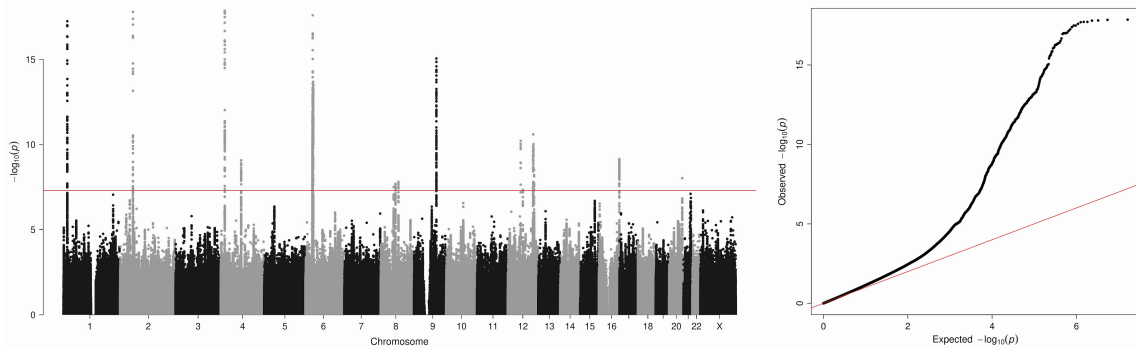

**Figure S30. Manhattan plot and Q-Q plot for association tests in TWB (batch 1 and batch 2 meta-analysis) for FEV1 to FVC ratio (FEV1R), related to Figure 2A**

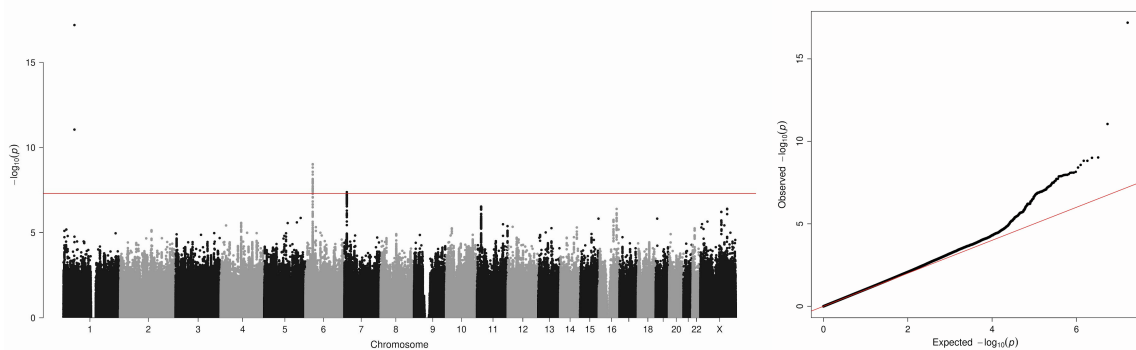



**Figure S31. Manhattan plot and Q-Q plot for association tests in TWB (batch 1 and batch 2 meta-analysis) for fasting glucose (FG), related to Figure 2A**

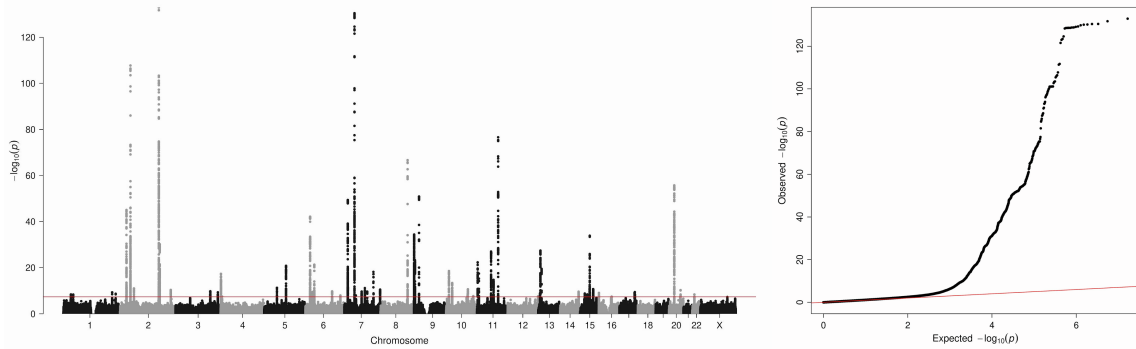

**Figure S32. Manhattan plot and Q-Q plot for association tests in TWB (batch 1 and batch 2 meta-analysis) for hemoglobin A1c (HbA1c), related to Figure 2A**

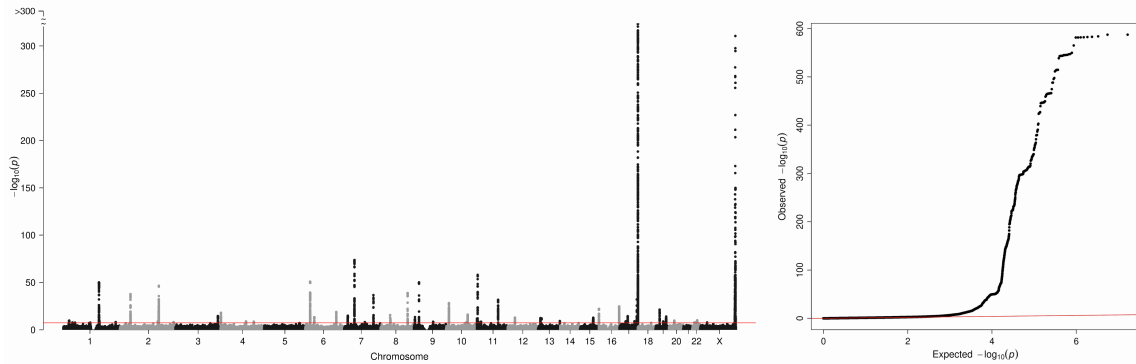

**Figure S33. Manhattan plot and Q-Q plot for association tests in TWB (batch 1 and batch 2 meta-analysis) for total cholesterol (TC), related to Figure 2A**

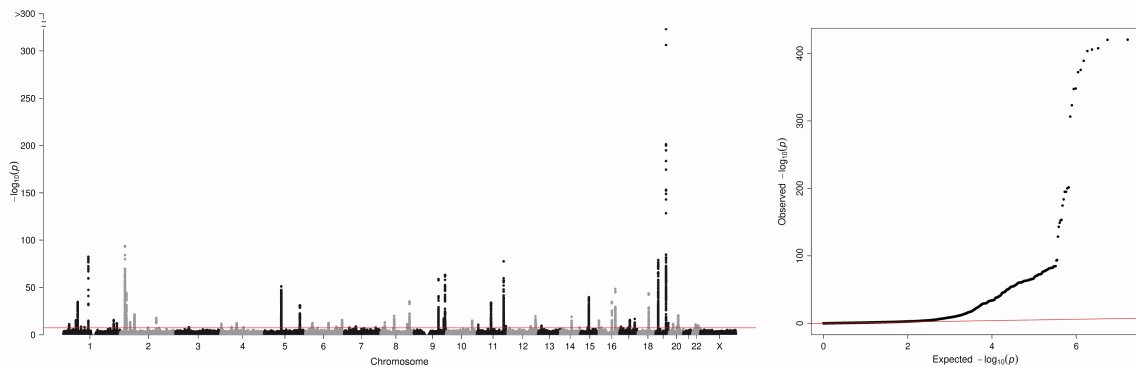

**Figure S34. Manhattan plot and Q-Q plot for association tests in TWB (batch 1 and batch 2 meta-analysis) for high-density-lipoprotein cholesterol (HDL-C), related to Figure 2A**

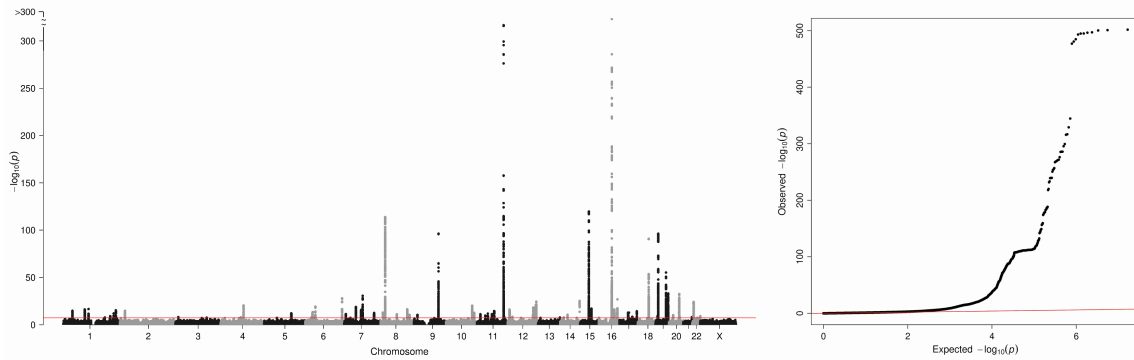

**Figure S35. Manhattan plot and Q-Q plot for association tests in TWB (batch 1 and batch 2 meta-analysis) for low-density-lipoprotein cholesterol (LDL-C), related to Figure 2A**

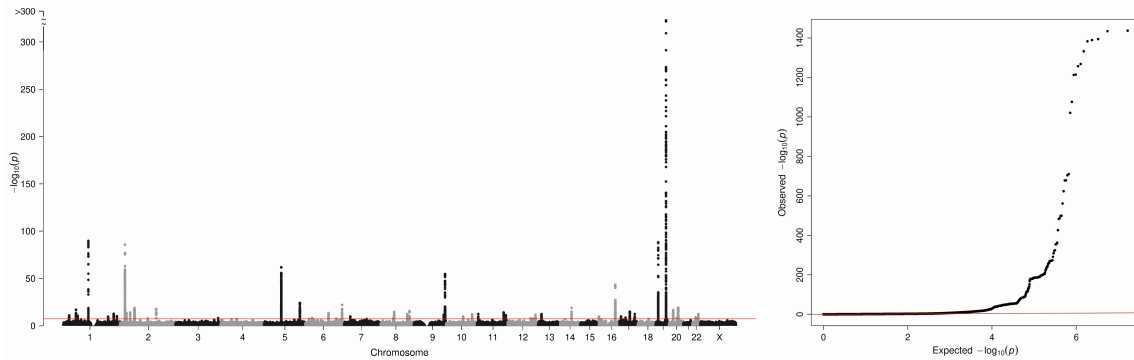

**Figure S36. Manhattan plot and Q-Q plot for association tests in TWB (batch 1 and batch 2 meta-analysis) for triglyceride (TG), related to Figure 2A**

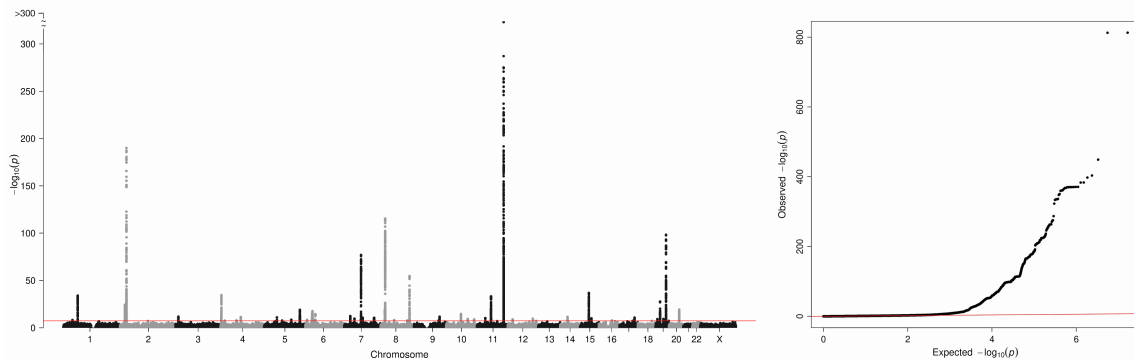

**Figure S37. Genome-wide significant loci identified in the TWB and BBJ meta-analysis, tallied based on their significance in TWB, BBJ, and UKBB in samples of European ancestries (related to Figure 4A)**

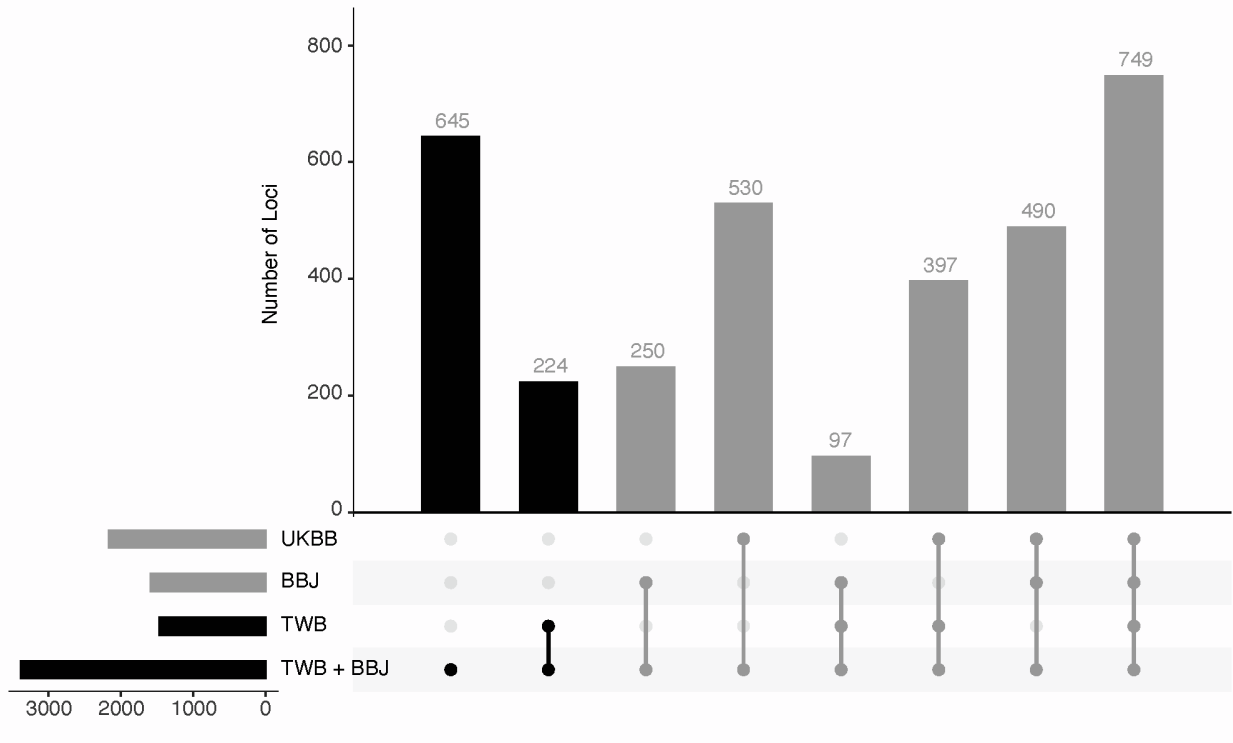

**Figure S38. Manhattan plot and Q-Q plot for heterogeneity tests between EAS (TWB and BBJ meta-analysis) and EUR (UKBB) genome-wide association tests for height (HT), related to Figure 4A**

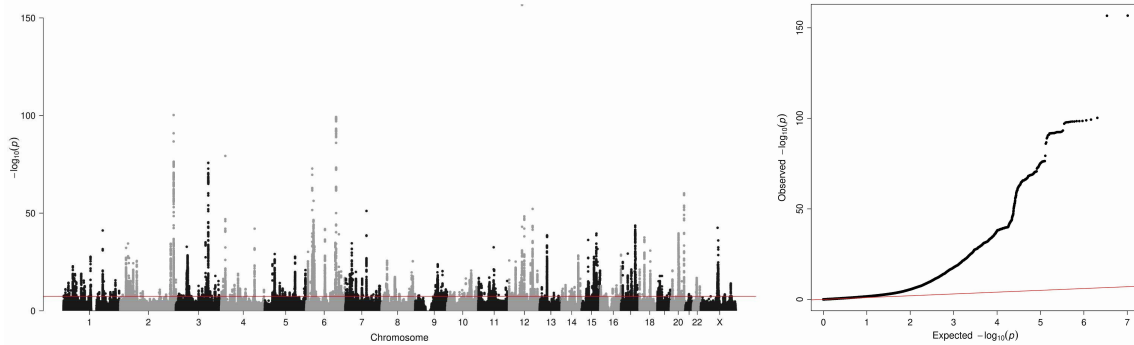

**Figure S39. Manhattan plot and Q-Q plot for heterogeneity tests between EAS (TWB and BBJ meta-analysis) and EUR (UKBB) genome-wide association tests for weight (WT), related to Figure 4A**

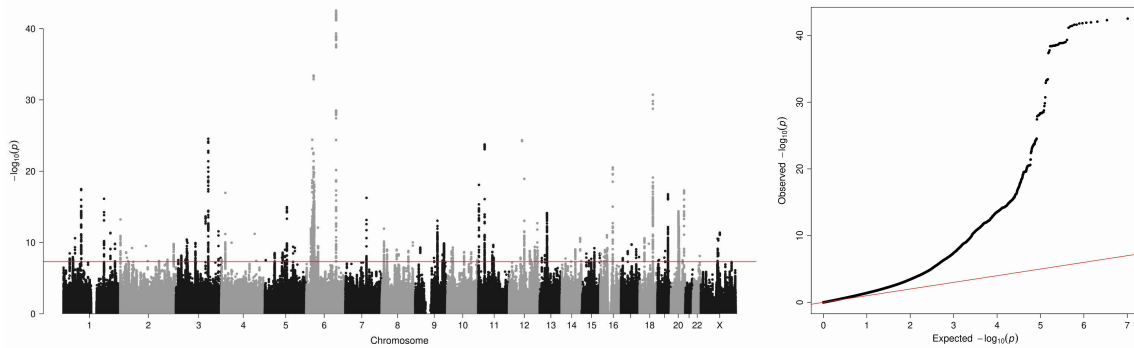

**Figure S40. Manhattan plot and Q-Q plot for heterogeneity tests between EAS (TWB and BBJ meta-analysis) and EUR (UKBB) genome-wide association tests for body mass index (BMI), related to Figure 4A**

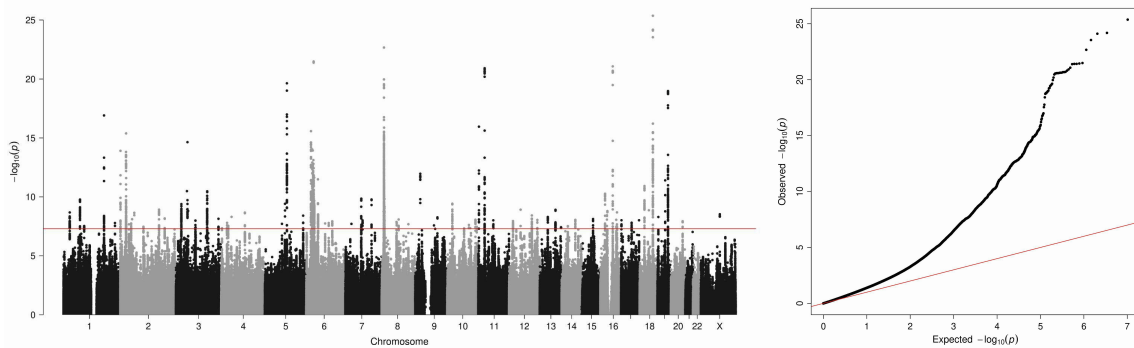

**Figure S41. Manhattan plot and Q-Q plot for heterogeneity tests between EAS (TWB) and EUR (UKBB) genome-wide association tests for body fat rate (BFR), related to Figure 4A**

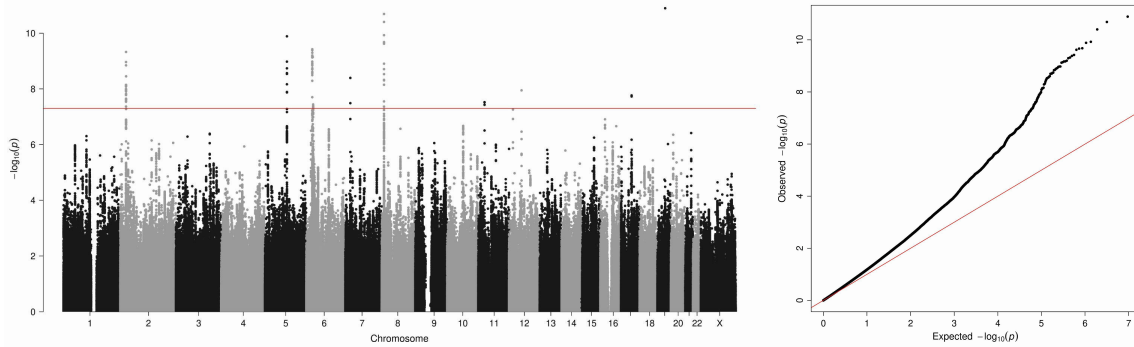

**Figure S42. Manhattan plot and Q-Q plot for heterogeneity tests between EAS (TWB) and EUR (UKBB) genome-wide association tests for waist circumference (WC), related to Figure 4A**

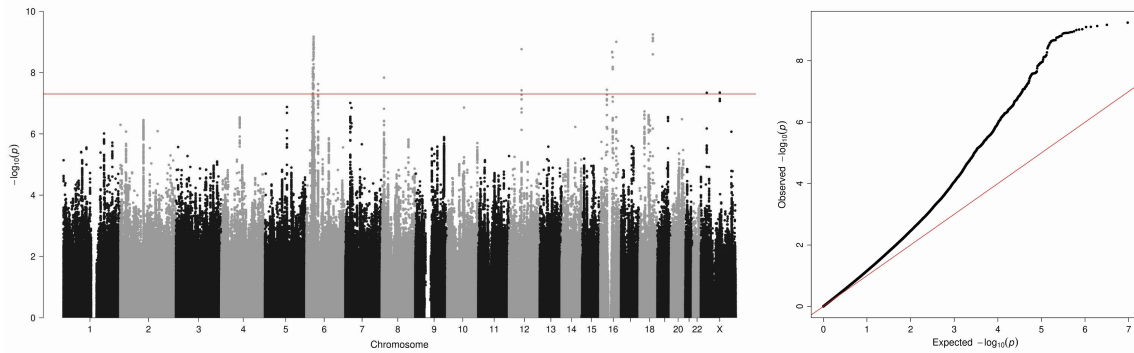

**Figure S43. Manhattan plot and Q-Q plot for heterogeneity tests between EAS (TWB) and EUR (UKBB) genome-wide association tests for hip circumference (HC), related to Figure 4A**

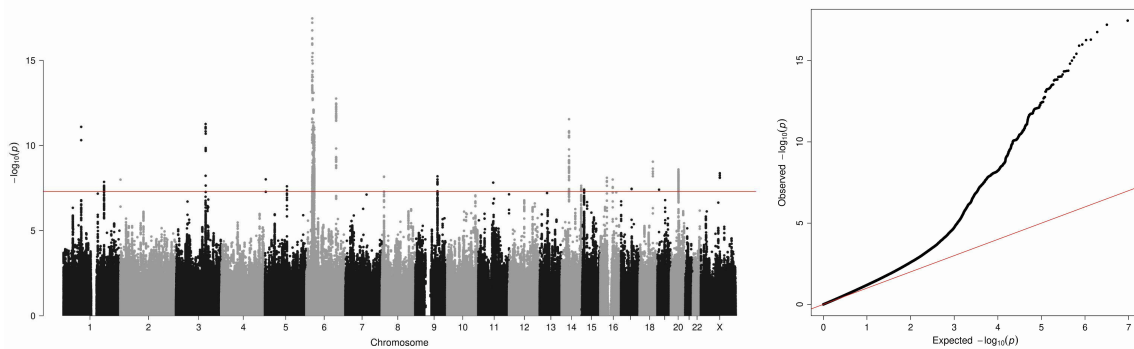

**Figure S44. Manhattan plot and Q-Q plot for heterogeneity tests between EAS (TWB) and EUR (UKBB) genome-wide association tests for bone mineral density T-score (BMD-T), related to Figure 4A**

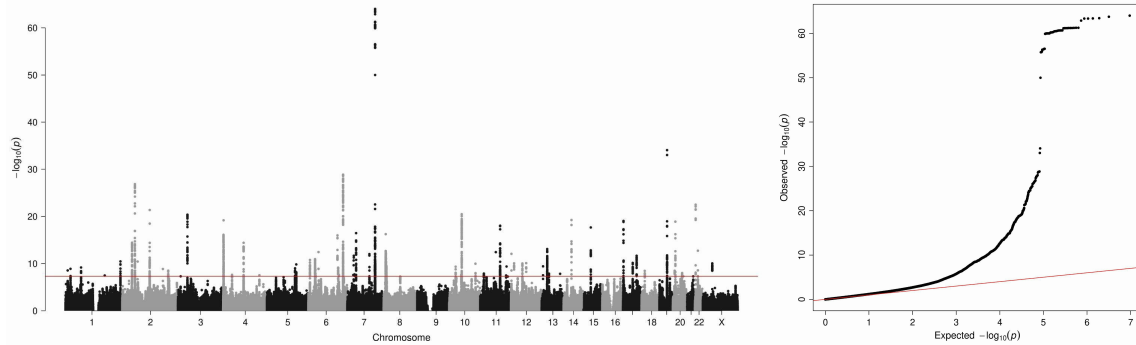

**Figure S45. Manhattan plot and Q-Q plot for heterogeneity tests between EAS (TWB and BBJ meta-analysis) and EUR (UKBB) genome-wide association tests for diastolic blood pressure (DBP), related to Figure 4A**

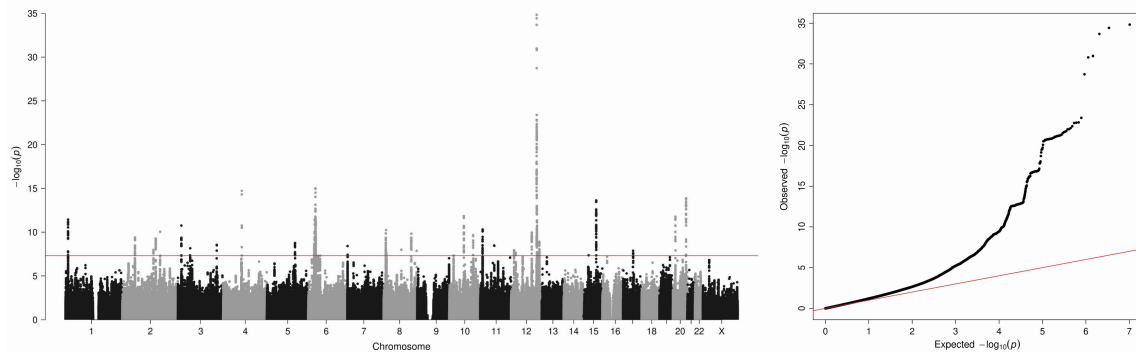

**Figure S46. Manhattan plot and Q-Q plot for heterogeneity tests between EAS (TWB and BBJ meta-analysis) and EUR (UKBB) genome-wide association tests for systolic blood pressure (SBP), related to Figure 4A**

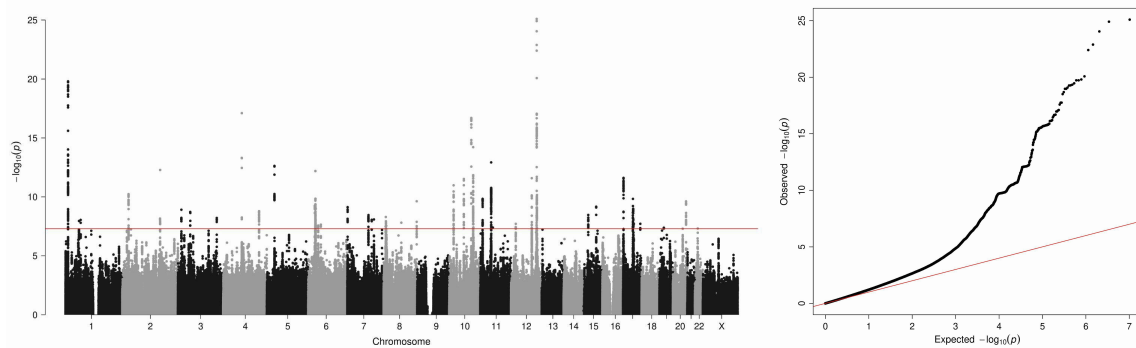

**Figure S47. Manhattan plot and Q-Q plot for heterogeneity tests between EAS (TWB and BBJ meta-analysis) and EUR (UKBB) genome-wide association tests for white blood cell (WBC), related to Figure 4A**

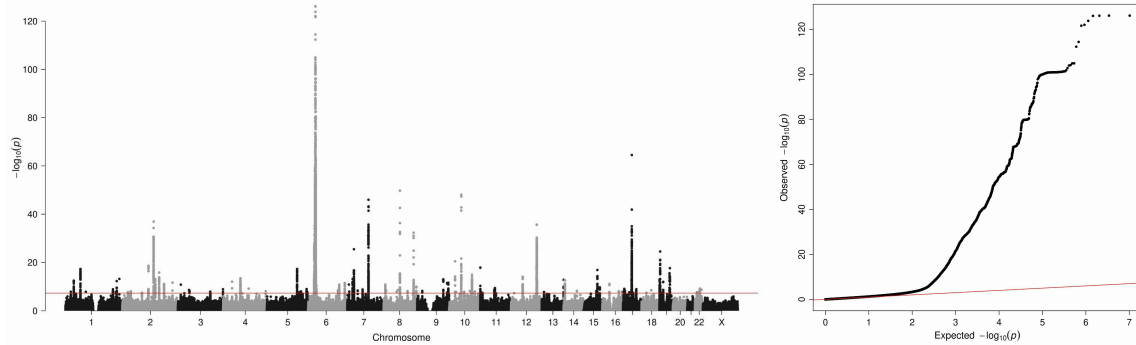

**Figure S48. Manhattan plot and Q-Q plot for heterogeneity tests between EAS (TWB and BBJ meta-analysis) and EUR (UKBB) genome-wide association tests for red blood cell (RBC), related to Figure 4A**

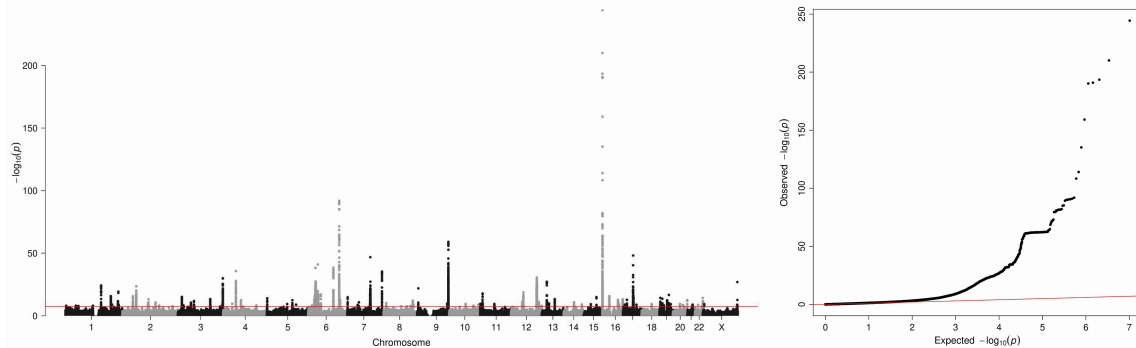

**Figure S49. Manhattan plot and Q-Q plot for heterogeneity tests between EAS (TWB and BBJ meta-analysis) and EUR (UKBB) genome-wide association tests for hemoglobin (HB), related to Figure 4A**

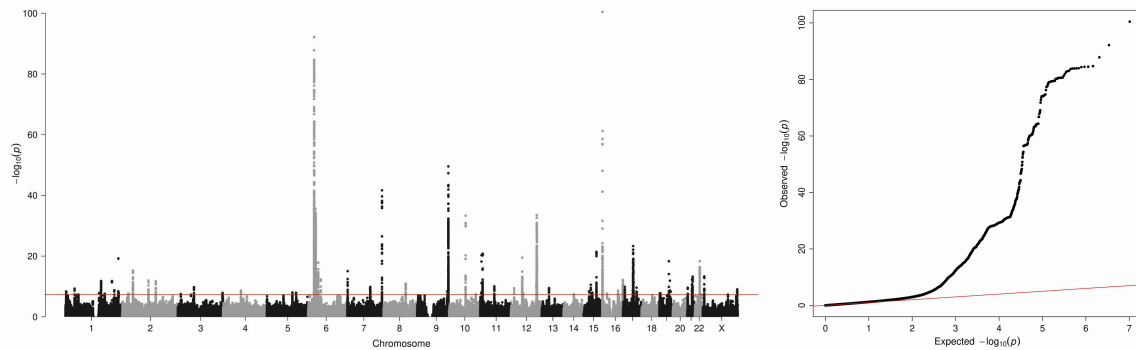

**Figure S50. Manhattan plot and Q-Q plot for heterogeneity tests between EAS (TWB and BBJ meta-analysis) and EUR (UKBB) genome-wide association tests for hematocrit (HCT), related to Figure 4A**

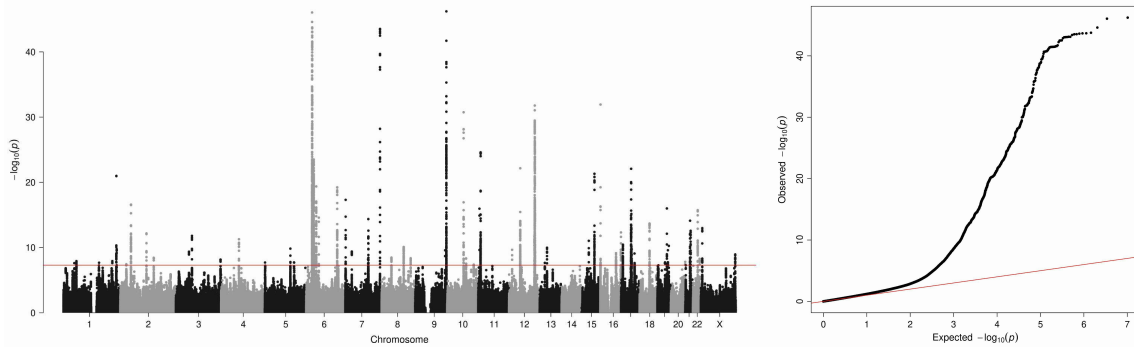

**Figure S51. Manhattan plot and Q-Q plot for heterogeneity tests between EAS (TWB and BBJ meta-analysis) and EUR (UKBB) genome-wide association tests for platelet (PLT), related to Figure 4A**

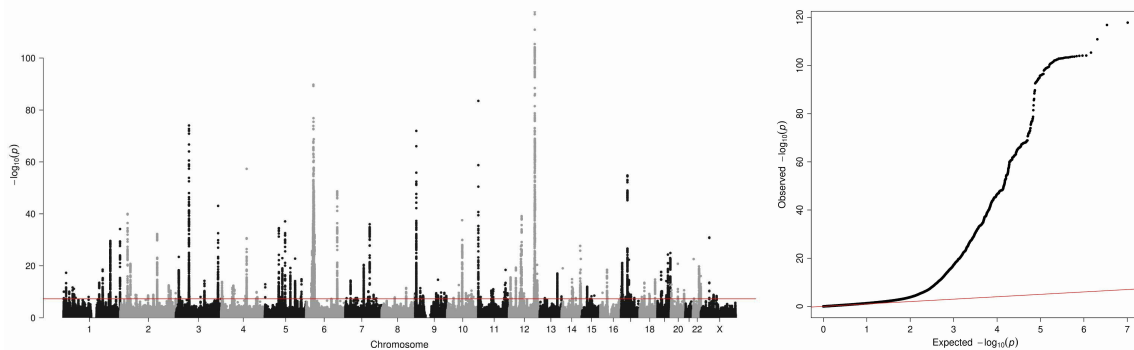

**Figure S52. Manhattan plot and Q-Q plot for heterogeneity tests between EAS (TWB and BBJ meta-analysis) and EUR (UKBB) genome-wide association tests for creatinine (CR), related to Figure 4A**

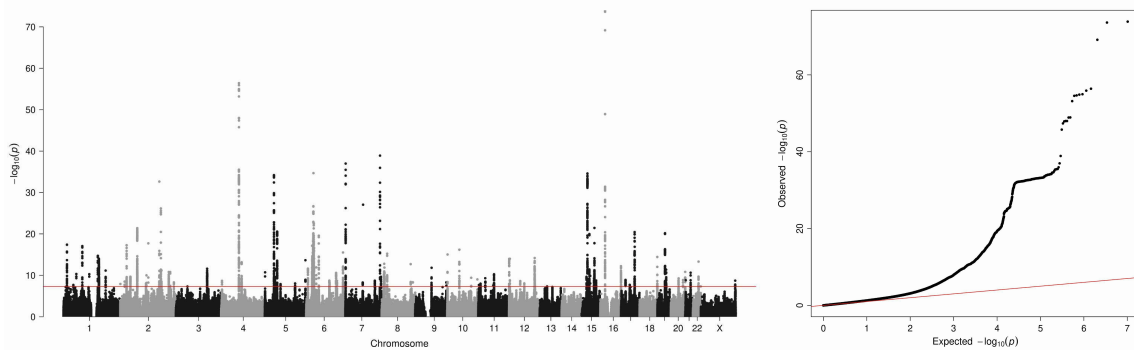



**Figure S53. Manhattan plot and Q-Q plot for heterogeneity tests between EAS (TWB) and EUR (UKBB) genome-wide association tests for microalbumin urine (mALB), related to Figure 4A**

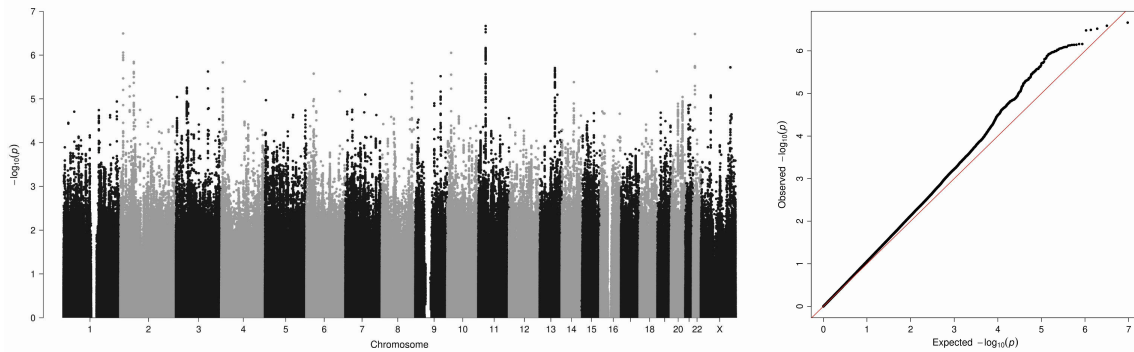

**Figure S54. Manhattan plot and Q-Q plot for heterogeneity tests between EAS (TWB and BBJ meta-analysis) and EUR (UKBB) genome-wide association tests for uric acid (UA), related to Figure 4A**

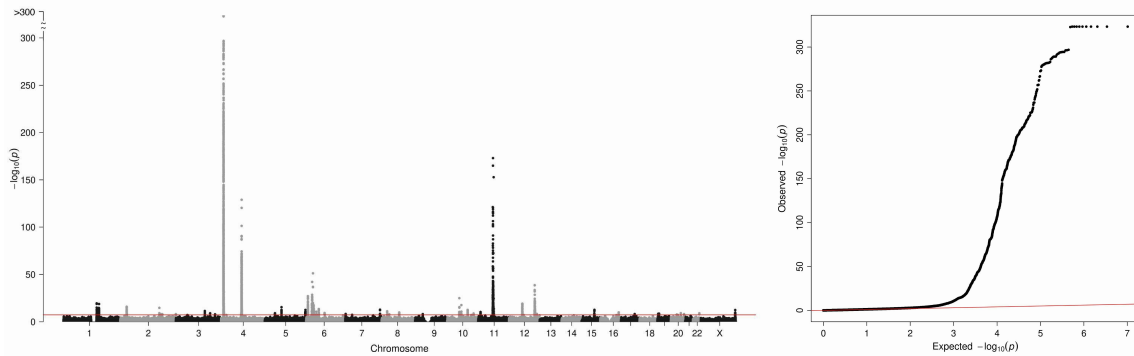

**Figure S55. Manhattan plot and Q-Q plot for heterogeneity tests between EAS (TWB and BBJ meta-analysis) and EUR (UKBB) genome-wide association tests for total bilirubin (T-BIL), related to Figure 4A**

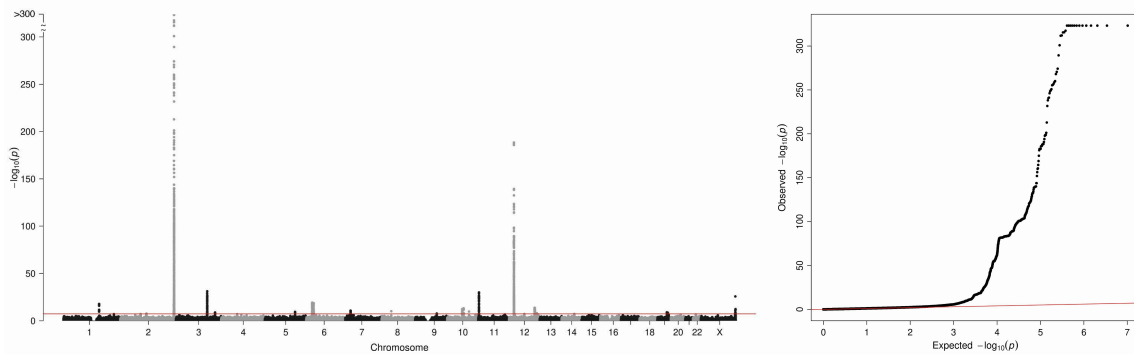

**Figure S56. Manhattan plot and Q-Q plot for heterogeneity tests between EAS (TWB and BBJ meta-analysis) and EUR (UKBB) genome-wide association tests for alanine aminotransferase (ALT), related to Figure 4A**

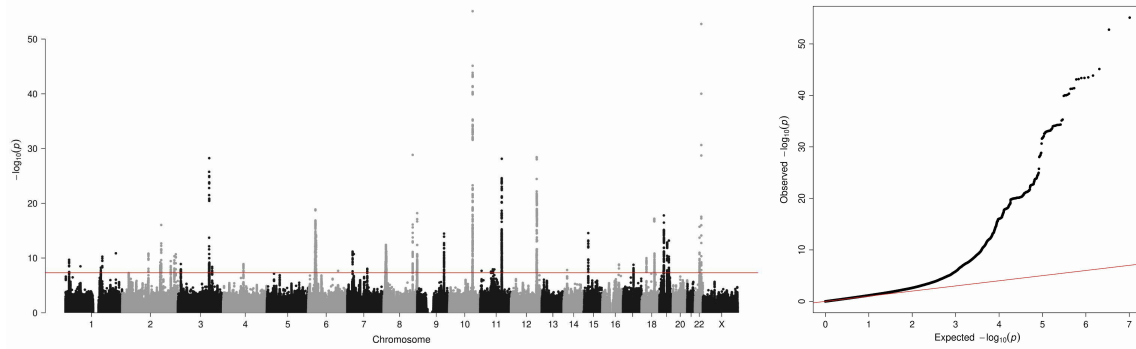

**Figure S57. Manhattan plot and Q-Q plot for heterogeneity tests between EAS (TWB and BBJ meta-analysis) and EUR (UKBB) genome-wide association tests for aspartate aminotransferase (AST), related to Figure 4A**

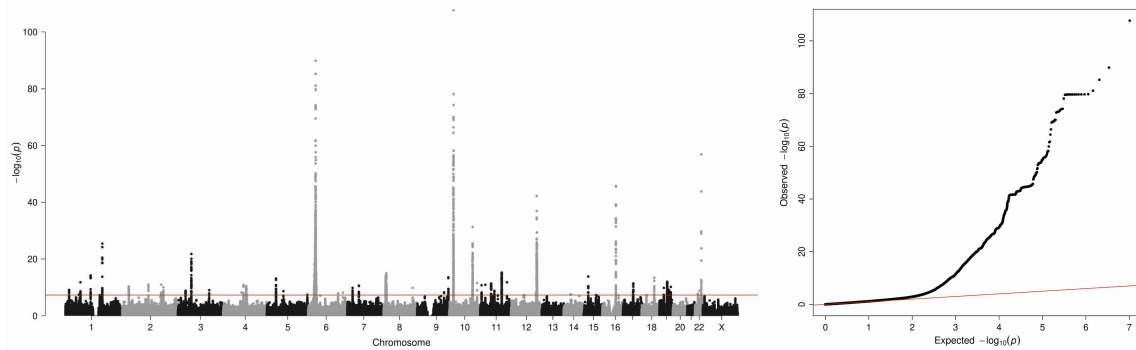

**Figure S58. Manhattan plot and Q-Q plot for heterogeneity tests between EAS (TWB and BBJ meta-analysis) and EUR (UKBB) genome-wide association tests for gamma-glutamyltransferase (GGT), related to Figure 4A**

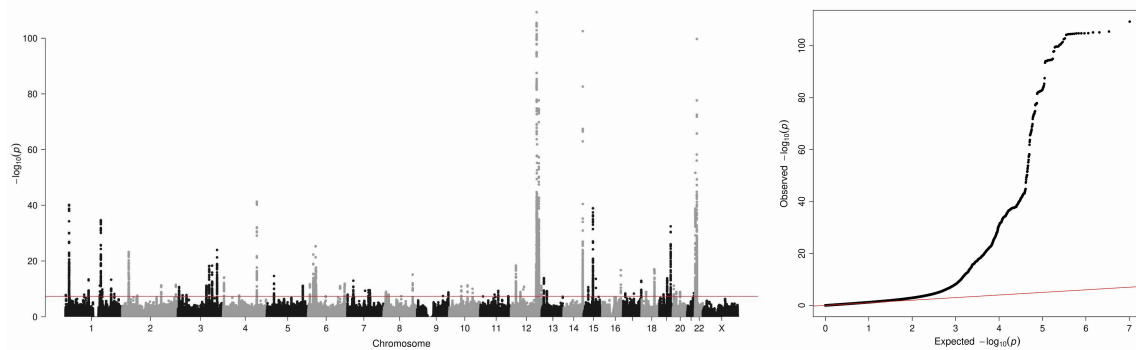

**Figure S59. Manhattan plot and Q-Q plot for heterogeneity tests between EAS (TWB and BBJ meta-analysis) and EUR (UKBB) genome-wide association tests for albumin (ALB), related to Figure 4A**

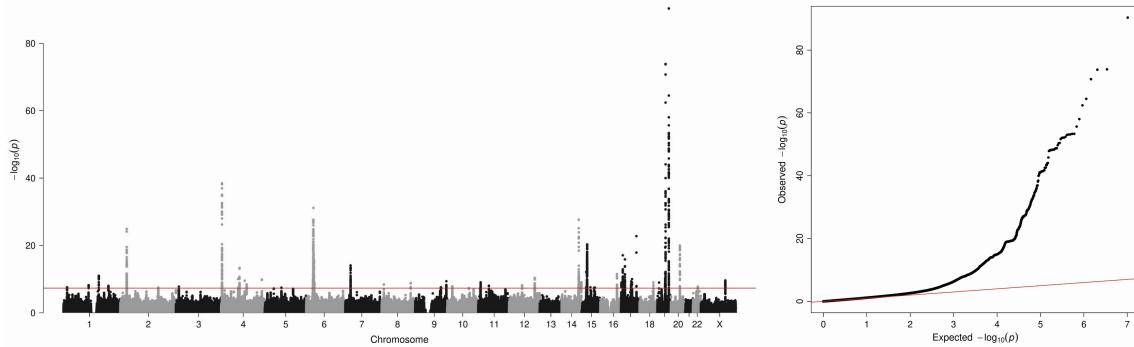

**Figure S60. Manhattan plot and Q-Q plot for heterogeneity tests between EAS (TWB) and EUR (UKBB) genome-wide association tests for forced expiratory flow (FEV1), related to Figure 4A**

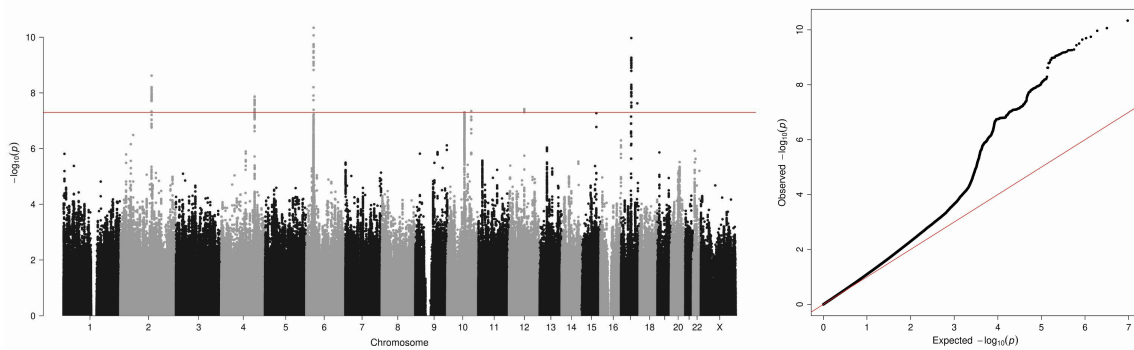

**Figure S61. Manhattan plot and Q-Q plot for heterogeneity tests between EAS (TWB) and EUR (UKBB) genome-wide association tests for forced vital capacity (FVC), related to Figure 4A**

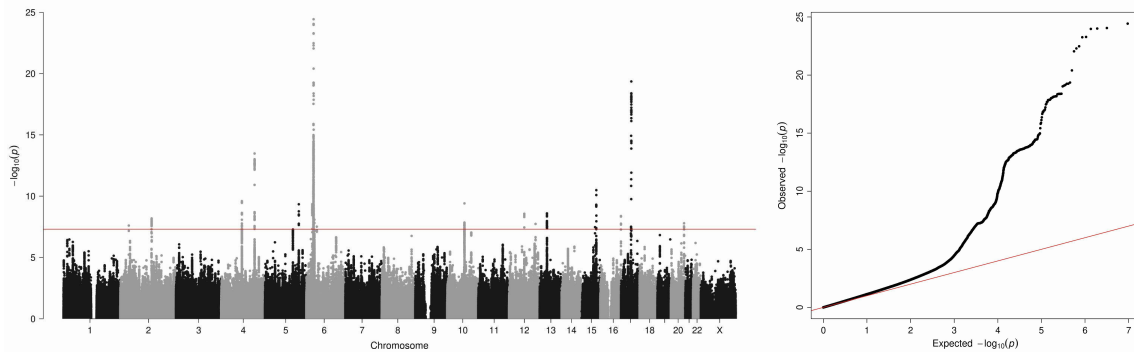

**Figure S62. Manhattan plot and Q-Q plot for heterogeneity tests between EAS (TWB and BBJ meta-analysis) and EUR (UKBB) genome-wide association tests for fasting glucose (FG), related to Figure 4A**

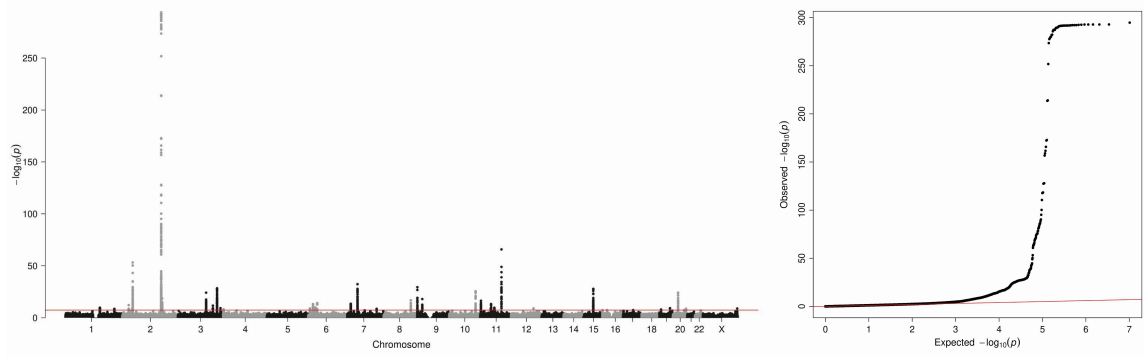

**Figure S63. Manhattan plot and Q-Q plot for heterogeneity tests between EAS (TWB and BBJ meta-analysis) and EUR (UKBB) genome-wide association tests for hemoglobin A1c (HbA1c), related to Figure 4A**

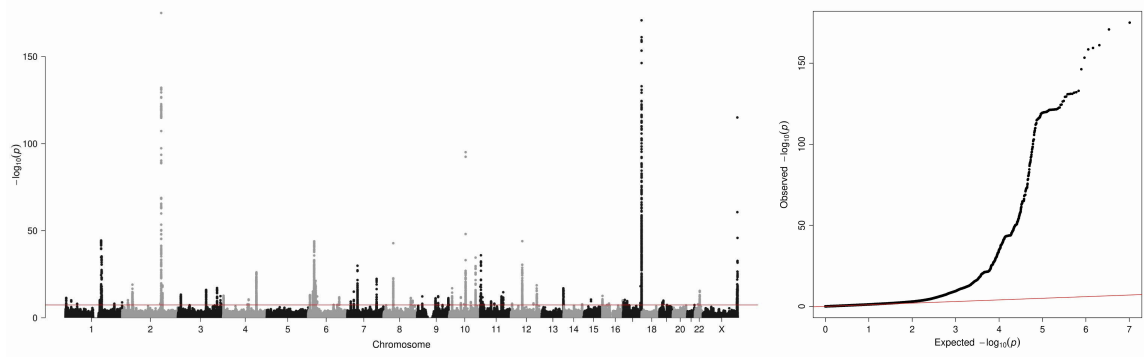

**Figure S64. Manhattan plot and Q-Q plot for heterogeneity tests between EAS (TWB and BBJ meta-analysis) and EUR (UKBB) genome-wide association tests for total cholesterol (TC), related to Figure 4A**

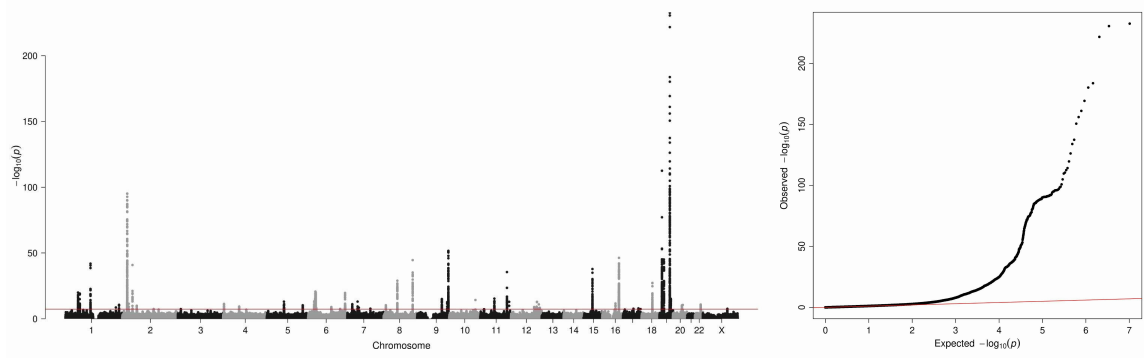

**Figure S65. Manhattan plot and Q-Q plot for heterogeneity tests between EAS (TWB and BBJ meta-analysis) and EUR (UKBB) genome-wide association tests for high-density-lipoprotein cholesterol (HDL-C), related to Figure 4A**

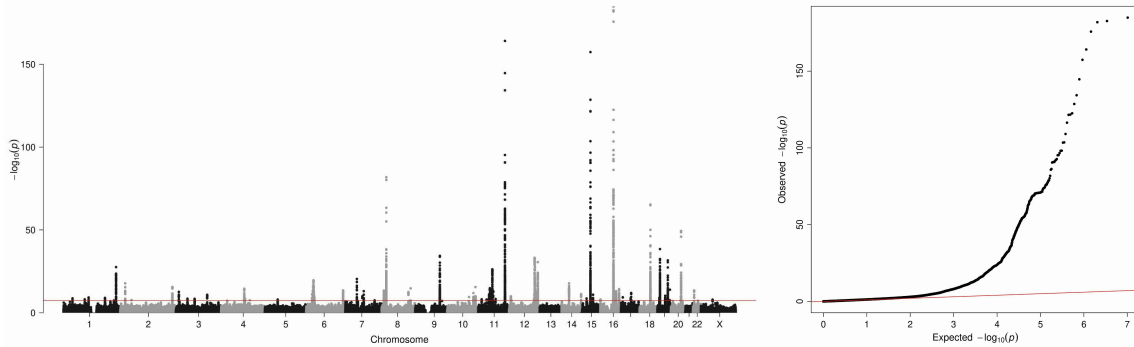

**Figure S66. Manhattan plot and Q-Q plot for heterogeneity tests between EAS (TWB and BBJ meta-analysis) and EUR (UKBB) genome-wide association tests for low-density-lipoprotein cholesterol (LDL-C), related to Figure 4A**

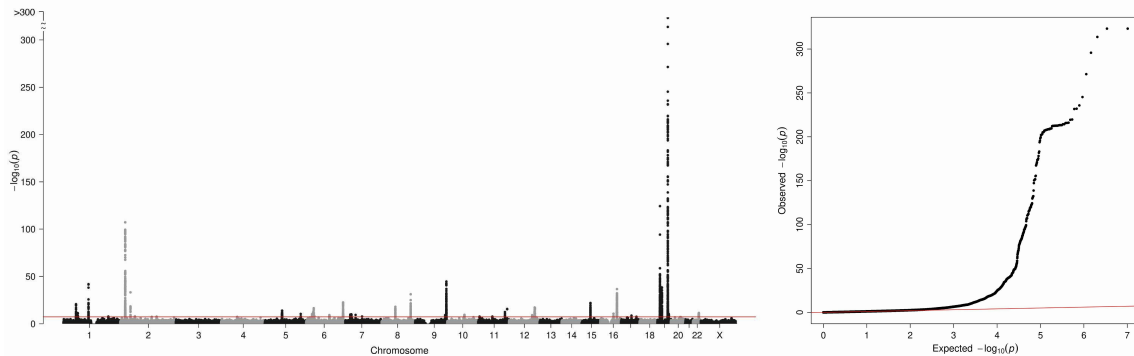

**Figure S67. Manhattan plot and Q-Q plot for heterogeneity tests between EAS (TWB and BBJ meta-analysis) and EUR (UKBB) genome-wide association tests for triglyceride (TG), related to Figure 4A**

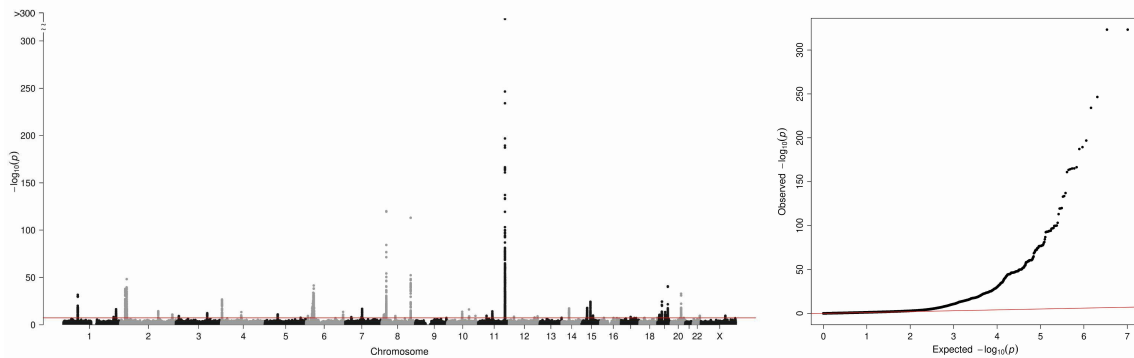

**Figure 68. Distribution of polygenic risk scores (PRS) in Taiwan Biobank sub-populations (related to Figure 5).** PRS were calculated based on summary statistics from eight external GWAS in samples of European or East Asian ancestries (see Methods). The three sub-populations in TWB were defined by self-reported paternal and maternal place of ancestral origin, where samples in each group have the same paternal and maternal place of ancestral origin (see Feng et al. for details) <sup>1</sup>.

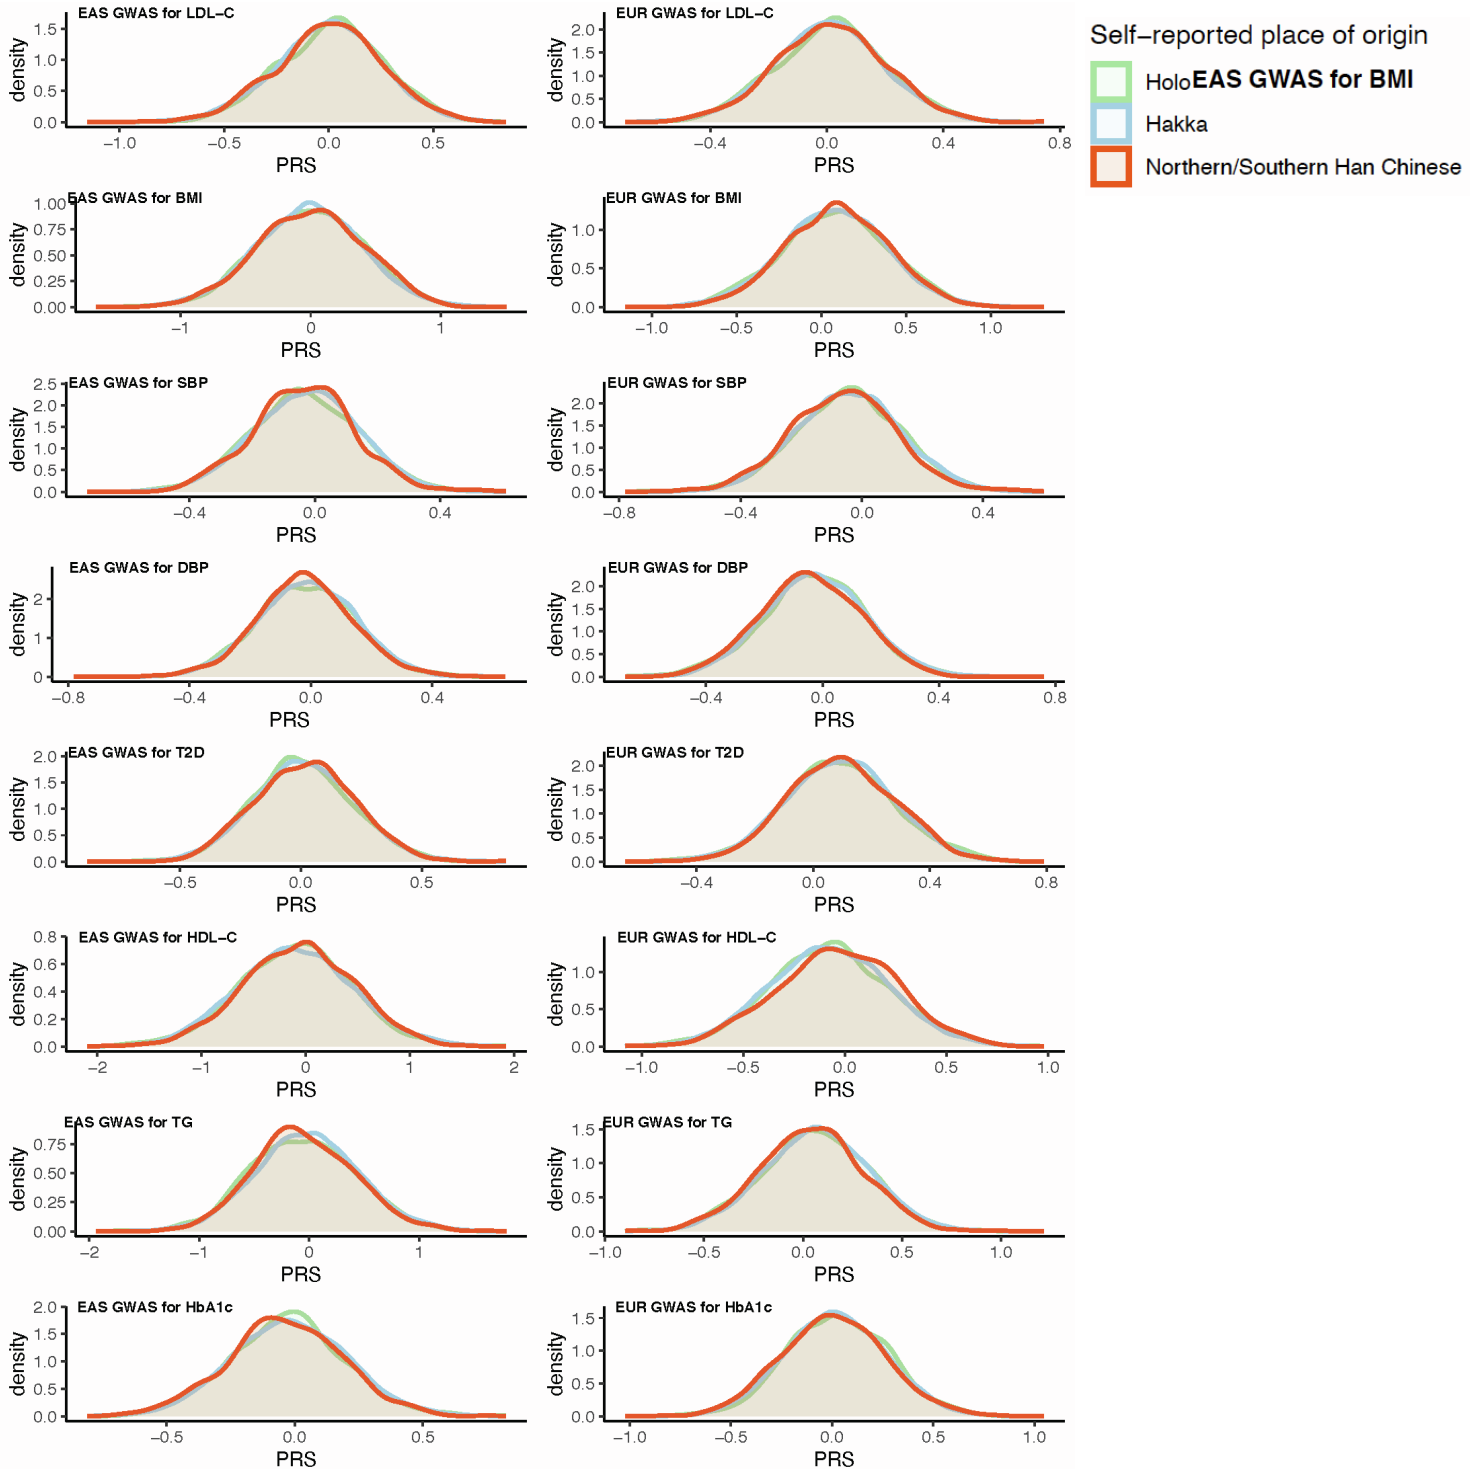

## References

1. Feng, Y.-C.A., Chen, C.-Y., Chen, T.-T., Kuo, P.-H., Hsu, Y.-H., Yang, H.-I., Chen, W.J., Su, M.-W., Chu, H.-W., Shen, C.-Y., et al. (2022). Taiwan Biobank: A rich biomedical research database of the Taiwanese population. *Cell Genom* 2, 100197.
